# Supplementary material for: Antivirulence Agent as an Adjuvant of β-Lactam Antibiotics in Treating Staphylococcal Infections
Source: MDPI journal article supplement (doi:10.3390/antibiotics11060819), 2022-06-17
Supplement: s1 [file s1]

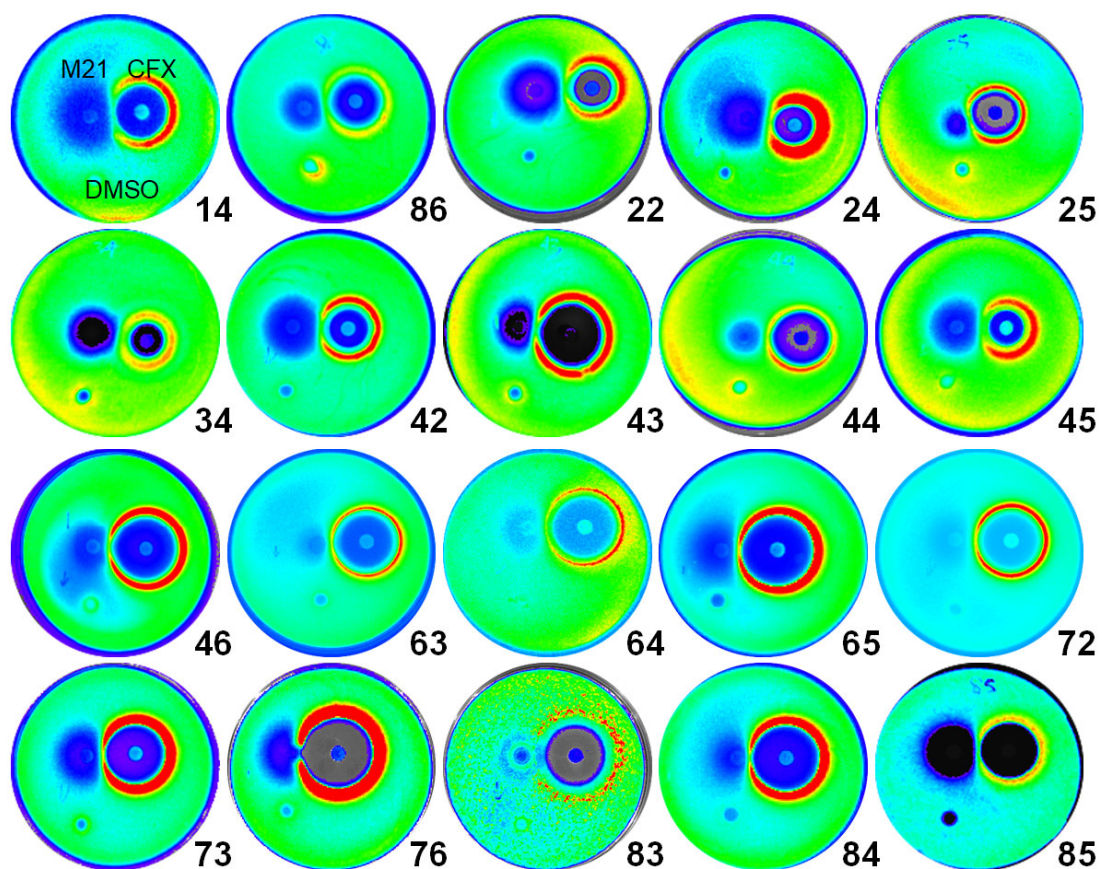

**Figure S1. Paper disc assay showing the interaction of M21 with cefoxitin.**

Cefoxitin (4mM, 5  $\mu$ l) induced *hla* expression against different clinical isolates. M21 (4 mM, 5 $\mu$ l) repressed *hla* expression even in the induced state.
